# Supplementary material for: The Differences in the Prevalence of Cardiovascular Disease, Its Risk Factors, and Achievement of Therapeutic Goals among Urban and Rural Primary Care Patients in Poland: Results from the LIPIDOGRAM 2015 Study
Source: MDPI journal article supplement (doi:10.3390/jcm10235656), 2021-11-30
Supplement: s1 [file s1]

## Supplementary 1 - LIPIDOGRAM2015 Investigators

Al-Shaer B., Andrusewicz W., Andrzejczuk-Rosa M., Anusz-Gaszewska E., Bagińska A., Balawajder P., Bańka G., Barańska-Skubisz E., Barbara Przyczyna B., Bartkowiak S., Bartodziej J., Bartosiewicz M., Basałyga M., Batyra A., Bąk A., Bednarz M., Bejnar K., Bernacki W., Betiuk-Kwiatkowska M., Biegaj S., Bień M., Bilski W., Biłogan M., Biruta-Pawłowska G., Biskup A., Błaszczuk B., Błaszczuk H., Błońska-Jankowska T., Bogacka-Gancarczyk B., Bojanowska M., Bonda E., Borowik-Skwarek J., Borowska J., Bruckner J., Brzostek J., Brzuchacz M., Budzyńska M., Bulzacka-Fugiel I., Bulzak J., Bunikowski K., Cebulska A., Celka T., Cempel-Nowak E., Chechliński W., Chludzińska A., Chmiel D., Chmielewska M., Cichy M., Ciemięga A., Ciepluch A., Cieszyńska I., Czajka B., Czapla B., Czermer M., Czerwińska B., Czurylszkiewicz W., Daleka E., Dawid Z., Dąbrowska M., Dąbrowska R., Dąbrowski D., Dąbrowski M., Demczyszyn K., Dębowska-Serwińska A., Dmochowski J., Dobrzecka-Kiwior J., Dolanowska E., Dolanowski H., Dołek P., Domagała M., Domański H., Doszel A., Duda D., Dudkowska M., Dudziuk B., Dybciak P., Dymanowski M., Dziadzio-Bolek L., Eicke M., El-Hassan H., Eremus A., Fąferek-Muller M., Figura-Roguska E., Fijałkowska-Kaczmarek I., Flis M., Florczak T., Florczuk M., Foryszewska-Witan E., Frydrych W., Fugiel A., Futyma E., Gaca-Jaroszewicz A., Gajdamowicz I., Ganczarski K., Gatnar A., Gers M., Głowacki A., Głód K., Godula J., Gołąb J., Gołębiowski M., Goszczyńska E., Gościcka K., Górna-Hajduga A., Górny E., Grabowska T., Grabowski R., Graczyk-Duda A., Gromow A., Grudewicz A., Gruszecka J., Gruszka A., Gryboś J., Grzebyk J., Grzechowiak A., Grzesiak D., Grześkowiak T., Guźla A., Hachuła G., Hawel B., Hiltawska H., Honkowicz E., Ignatowicz J., Imielski K., Iwaniura A., Jagieła-Szymala A., Jalc-Sowała M., Janczylik A., Janisz E., Janiszek M., Jankiewicz-Ziobro K., Januszewska K., Jaremek A., Jaros-Urbaniak A., Jarosz J., Jarosz P., Jasiński W., Jezierska-Wasilewska M., Jędraszewski T., Jędrzejowska A., Józefowicz R., Juźwin K., Kacprzak E., Kaczmarek-Szewczyk J., Kaczmarzyk M., Kandziora R., Kaniewski C., Karolak-Brandt L., Kasperczyk S., Kasperek-Dyląg E., Kedziora I., Kępa A., Kiciński J., Kielak-Al-Hosam J.,

Kielczawa Ł., Kilimowicz P., Kitliński K., Kiwka T., Klein U., Klichowicz L., Klimowicz A., Klonowski B., Kmolek B., Kobyłko-Klepacka E., Kocoń A., Kolenda A., Kollek E., Kopec M., Koper-Kozikowska B., Koralewska J., Korczyńska M., Korzeniewski M. T., Kosk A., Kotarski K., Kowalczyk E., Kowalczyk M., Kowalik I., Kozak-Błażkiewicz B., Kozik M., Kozłowska D., Kozłowska E., Kozłowska M., Kozubski T., Kózka K., Kraśnik L., Krężel T., Krochmal B., Król B., Król G., Król J., Królikowska T., Kruszewska H., Krygier-Potrykus B., Krystek W., Krzysztoń J., Kubicki T., Kuczmierczyk-El-Hassan A., Kuczyńska-Witek W., Kujda D., Kurowski A., Kurzelewska-Solarz I., Kwaczyńska M., Kwaśniak M., Kwaśniak P., Kwietniewska T., Łebek-Ordon A., Lebedowicz A., Lejkowska-Olszewska L., Lentas M., Lesiewicz-Ksycińska A., Limanowski M., Łoniewski S., Łopata J. A., Łubianka B., Łukasiuk I., Łuzna M., Łysiak M., Łysik B., Machowski Z., Maciaczyk-Kubiak J., Mackiewicz-Zabochnicka G., Magner-Krężel Z., Majda S., Malinowski P., Mantyka J., Marchlik E., Martyna-Ordyniec G., Marzec J., Marzec M., Matejko-Wałkiewicz R., Mazur M., Michalczak M., Michalska-Żyłka A., Michniewicz M., Mika-Staniszevska D., Mikiciuk E., Mikołajczak T., Milewski J., Miller E., Misiaszek B., Mizik-Łukowska M., Młyńczyk-Pokutycka E., Mocek M., Moczala M., Morawska-Hermanowicz M., Moryc P., Moskal A., Moskal S., Moździerz A., Moździerz P., Mrozińska M., Mrozowicz K., Mróz G., Munia T., Mura A., Muras-Skudlarska M., Murawska E. Z., Murawski Ł., Murawski R., Musielak R., Nadaj K., Nagarnowicz W., Napierała R., Niedźwiecka M., Niemirski A., Nikiel J., Nosal M., Nowacki W., Nowak J., Nyrka M., Obst A., Ochowicz J., Ogonowska E., Oleszczyk M., Ołdakowski A., Ołowniuk-Stefaniak I., Ordowska-Rejman J., Orliński M., Osińska B., Ostańska-Burian A., Paciorkowska A., Paczkowska U., Paluch L., Pałka L., Paszko-Wojtkowska J., Paszkowska A., Pawlak-Ganczarska E., Pawlik W., Pawłowska I., Paździora M., Permiakow G., Petlic-Marendziak A., Piasecka T., Piaścińska E., Piktel A., Pilarska-Igielska A., Piotrkowska A., Piwowar-Klag K., Planer M., Plewa J., Płatkiewicz P., Płonczyńska B., Podgórska A., Polewska M., Porębska B., Porwoł P., Potakowska I., Prokop A., Przybylski J., Przybyła M., Psiuk H., Ptak K., Puzoń G., Rabiza N., Rachwalik S., Raczyńska E., Raniszewska M., Romanek-Kozik A., Rosa A., Rosa K., Rozewicz A., Rudzka-Kaławak J., Rusak J., Rutkowska D., Rybacki M., Rybińska D., Rycyk-Sadowska A., Rynda L.,

Rynkiewicz B., Sadowska-Krawczyk B., Sadowska-Zarzycka M., Sarnecka B., Sawalach-Tomanik E., Sidor-Drozd B., Siemieniak-Dębska M., Sieroń A., Siewniak-Zalewska B., Sikora A., Sitarska-Pawlina B., Skorupski J., Skrzypińska-Mansfeld I., Skubisz J., Skwarek R., Słodyczka M., Smentek M., Smolińska K., Solarz B., Sosnowska W., Sroka B., Stachura H., Stangreciak D., Staniak M., Stańczyk Z., Stańczczak-Ozga D., Startek E., Stefańczyk M., Stelmach R., Sternadel-Rączka E., Sternik M., Stępień J., Stocka J., Stokowska-Wojda M., Studler-Karpińska M., Suchorukow W., Sufryd W., Supłacz B., Sygacz J., Szczepański Ł., Szkandera J., Szłapa-Zellner J., Szydłarska D., Śliwa T., Śliwka J., Śmiejkowski Ł., Targońska A., Tesarska E., Tobiasz M., Tomaka J., Tomalska-Bywalec K., Tomiak E., Topczewski S., Trawińska A., Trela-Mucha L., Trojanowski D., Trzaskowska M., Trzińska-Larska B., Trznadel-Mozul A., Ulanicka-Liwoch K., Urbanowicz M., Uthke-Kluzek A., Waczyński J., Walczak J., Warsz L., Wasyńczuk M., Wąchała-Jędras U., Wąsowicz D., Wczysła J., Wenda F., Werner-Kubicka E., Weryszko E., Węgrzynowska B., Wiaksa M., Wiankowski M., Wicherek A., Wieczorek R., Wiencek R., Wienzek-Tatara G., Wierzbicka B., Wierzbicki M., Wilczyńska B., Wilmańska D., Winiarski P., Wiszniewska-Pabiszczak A., Witkowska M. B., Witzling J., Wlaż A., Wojtkowiak I., Woydyło J., Woźniak K., Wójtowicz A., Wrona J., Wrońska M., Wujkowska H., Wyrąbek J., Wysokiński O., Zakrzewski R., Zaleska-Zatkalik J., Zaleski J., Zalewska- Dybciak M., Zalewska E., Zalewska-Uchimiak B., Zawadzka-Krajewska J., Zawadzki J., Zieliński A., Zubrycka E., Żybort I., Żymełka M.

Table S1–Treatment used by LIPIDOGram 2015 study participants

|                                              | all              |                  |      | women           |                 |      | men             |                 |        |
|----------------------------------------------|------------------|------------------|------|-----------------|-----------------|------|-----------------|-----------------|--------|
|                                              | urban            | rural            | p    | urban           | rural           | p    | urban           | rural           | p      |
| <b>Total n (%)</b>                           | 7028<br>(51.21%) | 6696<br>(48.79%) |      | 4495<br>(51.7%) | 4195<br>(48.3%) | 0.11 | 2533<br>(50.3%) | 2501<br>(49.7%) | 0.11   |
| <b><u>Treatment n (%)</u></b>                |                  |                  |      |                 |                 |      |                 |                 |        |
| <b>Lipid lowering</b>                        |                  |                  |      |                 |                 |      |                 |                 |        |
| • fibrate                                    | 242<br>(3.44%)   | 222 (3.32%)      | 0.68 | 111<br>(2.47%)  | 102<br>(2.43%)  | 0.91 | 131<br>(5.17%)  | 120<br>(4.80%)  | 0.54   |
| • simvastatin                                | 657<br>(9.35%)   | 565 (8.44%)      | 0.06 | 411<br>(9.14%)  | 339<br>(8.08%)  | 0.08 | 246<br>(9.71%)  | 226<br>(9.04%)  | 0.41   |
| • atorvastatin                               | 821<br>(11.68%)  | 779<br>(11.63%)  | 0.93 | 510<br>(11.35%) | 448<br>(10.68%) | 0.32 | 311<br>(12.28%) | 331<br>(13.23%) | 0.31   |
| • rosuvastatin                               | 628<br>(8.94%)   | 632 (9.44%)      | 0.31 | 384<br>(8.54%)  | 358<br>(8.53%)  | 0.99 | 244<br>(9.63%)  | 274<br>(10.96%) | 0.12   |
| • ezetimibe                                  | 72 (1.02%)       | 83 (1.24%)       | 0.23 | 43 (0.96%)      | 42 (1.00%)      | 0.83 | 29 (1.14%)      | 41 (1.64%)      | 0.13   |
| • other                                      | 113<br>(1.61%)   | 151 (2.62%)      | 0.01 | 75 (1.67%)      | 99 (2.36%)      | 0.02 | 38 (1.50%)      | 52 (2.08%)      | 0.12   |
| • combined (use of ≥2 drugs)                 | 125<br>(1.78%)   | 137 (2.05%)      | 0.25 | 64 (1.42%)      | 54 (1.29%)      | 0.58 | 61 (2.41%)      | 83 (3.32%)      | 0.05   |
| <b>Antidiabetic</b>                          |                  |                  |      |                 |                 |      |                 |                 |        |
| • gliclazide                                 | 83 (1.18%)       | 108 (1.61%)      | 0.03 | 51 (1.13%)      | 59 (1.41%)      | 0.26 | 32 (1.26%)      | 49 (1.96%)      | 0.0498 |
| • glimepiride                                | 102<br>(1.45%)   | 75 (1.12%)       | 0.09 | 58 (1.29%)      | 36 (0.86%)      | 0.05 | 44 (1.74%)      | 39 (1.56%)      | 0.62   |
| • glipizide                                  | 28 (0.40%)       | 40 (0.60%)       | 0.10 | 11 (0.24%)      | 22 (0.52%)      | 0.03 | 17 (0.67%)      | 18 (0.72%)      | 0.84   |
| • metformin                                  | 635<br>(9.04%)   | 588 (8.78%)      | 0.60 | 365<br>(8.12%)  | 317<br>(7.56%)  | 0.33 | 270<br>(10.66%) | 271<br>(10.84%) | 0.84   |
| • acarbose                                   | 39 (0.55%)       | 39 (0.58%)       | 0.83 | 17 (0.38%)      | 25 (0.60%)      | 0.14 | 22 (0.87%)      | 14 (0.56%)      | 0.19   |
| • insulin                                    | 205<br>(2.92%)   | 193 (2.88%)      | 0.90 | 109<br>(2.42%)  | 102<br>(2.43%)  | 0.98 | 96 (3.79%)      | 91 (3.64%)      | 0.78   |
| • other                                      | 55 (0.78%)       | 65 (0.97%)       | 0.24 | 24 (0.53%)      | 42 (1.00%)      | 0.01 | 31 (1.22%)      | 23 (0.92%)      | 0.29   |
| • combined (use of ≥2 drugs WITHOUT insulin) | 158<br>(2.25%)   | 167 (2.49%)      | 0.34 | 88 (1.96%)      | 89 (2.12%)      | 0.59 | 70 (2.76%)      | 78 (3.12%)      | 0.46   |
| • combined (use of insulin AND ≥1 drug)      | 95 (1.35%)       | 96 (1.43%)       | 0.68 | 47 (1.05%)      | 49 (1.17%)      | 0.59 | 48 (1.89%)      | 47 (1.88%)      | 0.97   |
| <b>Antihypertensive</b>                      |                  |                  |      |                 |                 |      |                 |                 |        |
| • ARBs                                       | 760<br>(10.81%)  | 729<br>(10.89%)  | 0.89 | 478<br>(10.63%) | 457<br>(10.89%) | 0.70 | 282<br>(11.13%) | 272<br>(10.88%) | 0.77   |
| • ACEI                                       | 1498<br>(21.31%) | 1430<br>(21.36%) | 0.95 | 896<br>(19.93%) | 805<br>(19.19%) | 0.38 | 602<br>(23.77%) | 625<br>(24.99%) | 0.31   |
| • CCB                                        | 579<br>(8.24%)   | 575 (8.59%)      | 0.46 | 333<br>(7.41%)  | 335<br>(7.99%)  | 0.31 | 246<br>(9.71%)  | 240<br>(9.60%)  | 0.89   |
| • diuretics                                  | 1310<br>(18.64%) | 1349<br>(20.15%) | 0.03 | 835<br>(18.58%) | 935<br>(19.90%) | 0.12 | 475<br>(18.75%) | 514<br>(20.55%) | 0.11   |
| • B-blockers                                 | 1422<br>(20.23%) | 1315<br>(19.64%) | 0.38 | 889<br>(19.78%) | 801<br>(19.09%) | 0.42 | 533<br>(21.04%) | 514<br>(20.55%) | 0.67   |
| • other                                      | 357<br>(5.08%)   | 369 (5.51%)      | 0.26 | 226<br>(5.03%)  | 227<br>(5.41%)  | 0.42 | 131<br>(5.17%)  | 142<br>(5.68%)  | 0.43   |

|                                                |                  |                  |      |                 |                 |      |                 |                 |      |
|------------------------------------------------|------------------|------------------|------|-----------------|-----------------|------|-----------------|-----------------|------|
| • use of 1 drug                                | 1551<br>(22.07%) | 1392<br>(20.79%) | 0.07 | 983<br>(21.87%) | 864<br>(20.60%) | 0.15 | 568<br>(22.42%) | 528<br>(21.11%) | 0.26 |
| • combined (use of $\geq 2$ drugs with FDC)    | 363<br>(5.17%)   | 349 (5.21%)      | 0.90 | 217<br>(4.83%)  | 189<br>(4.51%)  | 0.47 | 146<br>(5.76%)  | 160<br>(6.40%)  | 0.35 |
| • combined (use of $\geq 2$ drugs without FDC) | 1423<br>(20.25%) | 1437<br>(21.46%) | 0.08 | 874<br>(19.44%) | 872<br>(20.79%) | 0.12 | 549<br>(21.67%) | 565<br>(22.59%) | 0.43 |

p<0.05 was considered statistically significant. ASA - acetylsalicylic acid, NOAC - novel oral anticoagulants, FDC - fixed-dose combination, ARB - angiotensin receptor blockers, ACEI - angiotensin-converting enzyme inhibitors, CCB - calcium channel blockers.

**Figure S1–Therapeutic goals achievement according to 2018 ESH/ESC and 2019 ESC/EAS guidelines in the LIPIDOGram 2015 study.**

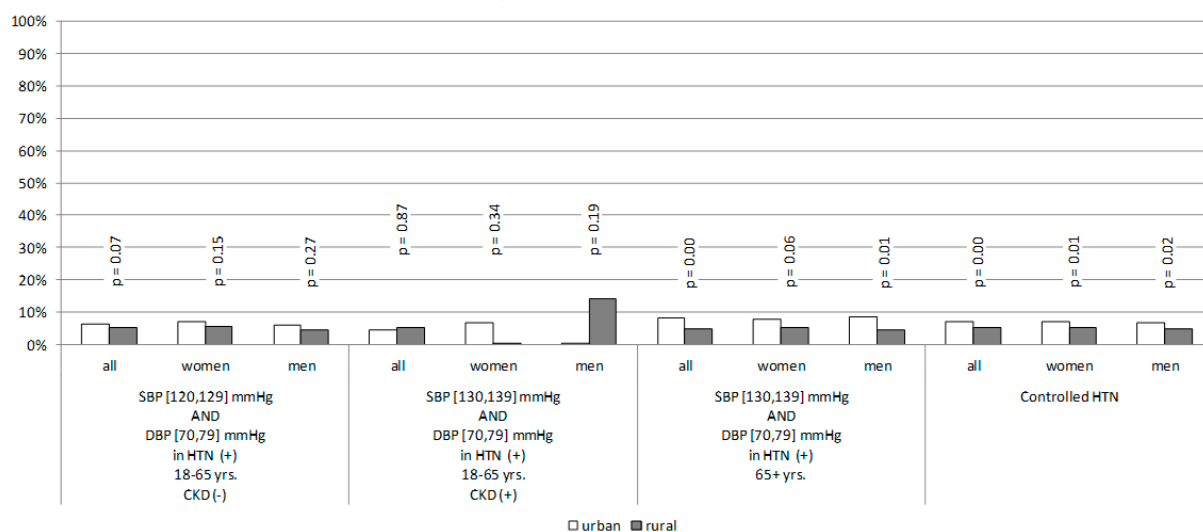

**a. Percentage of hypertensive patients reaching treatment goals according to 2018 ESH/ESC guidelines [1].**

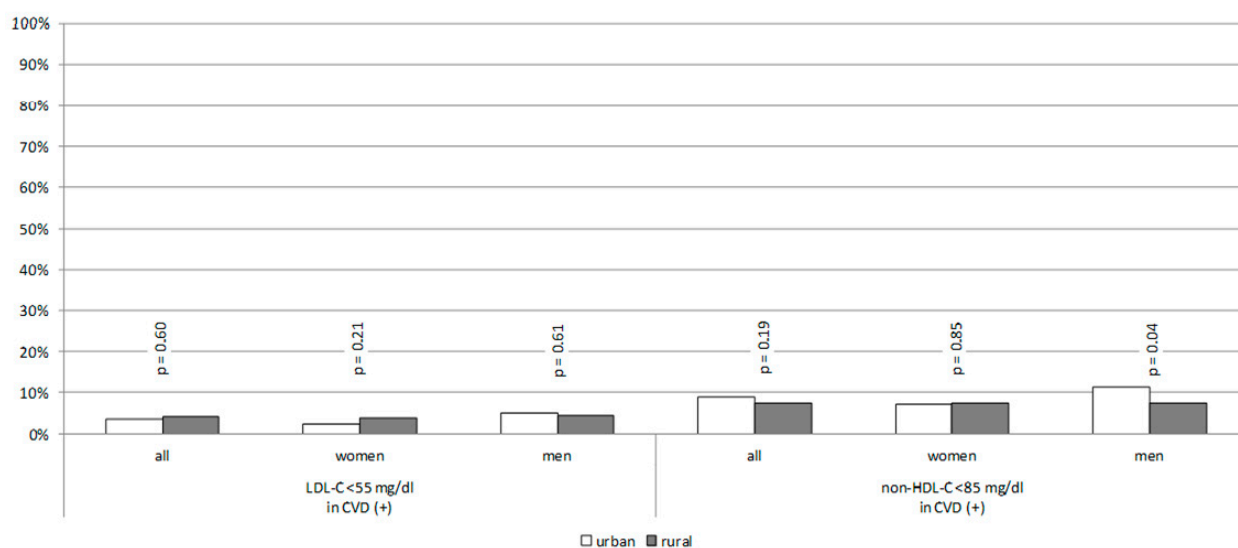

**b Percentage of patients with cardiovascular diseases reaching treatment goals according to 2019 ESC/EAS guidelines [2].**

**Abbreviations:**

HTN – hypertension, SBP – systolic blood pressure, DBP – diastolic blood pressure, CVD – cardiovascular disease, CKD – chronic kidney disease, CVD – cardiovascular disease, non-HDL-C – non high-density lipoprotein cholesterol, LDL-C – low-density lipoprotein cholesterol, TG – triglycerides

## References

1. Williams B, Mancia G, Spiering W, et al. 2018 Practice Guidelines for the management of arterial hypertension of the European Society of Hypertension and the European Society of Cardiology: ESH/ESC Task Force for the Management of Arterial Hypertension. *J Hypertens* 2018;36:2284–309. doi:10.1097/HJH.0000000000001961
2. Mach F, Baigent C, Catapano AL, et al. 2019 ESC/EAS Guidelines for the management of dyslipidaemias: lipid modification to reduce cardiovascular risk. *Eur Heart J* 2020;41:111–88. doi:10.1093/eurheartj/ehz455
